# Supplementary material for: Improved synthesis of bioactive stilbene derivatives applying design of experiments to the Heck–Matsuda reaction
Source: Royal Society of Chemistry journal article supplement (doi:10.1039/c4nj00601a), 2014-01-01
Supplement: c4nj00601a1.pdf [file c4nj00601a1.pdf]

*Supporting information for*

## Improved Synthesis of Bioactive Stilbene Derivatives Applying Design of Experiments to the Heck-Matsuda Reaction

Carla C. Perez, Jesus Marcelo Pena and Carlos Roque Duarte Correia

Chemistry Institute, State University of Campinas, UNICAMP, 13083-970, C.P. 6154,

Campinas, SP, Brazil

\* [roque@iqm.unicamp.br](mailto:roque@iqm.unicamp.br)

| <b>Contents</b>                                                                       | <b>Page</b> |
|---------------------------------------------------------------------------------------|-------------|
| <sup>1</sup> H NMR (250 MHz, CDCl <sub>3</sub> ) of compounds <b>3</b> and <b>5</b> . | S2          |
| <sup>13</sup> C NMR (62.5 MHz, CDCl <sub>3</sub> ) of <b>5</b>                        | S3          |
| <sup>1</sup> H NMR (250 MHz, CDCl <sub>3</sub> ) of <b>9</b>                          | S3          |
| <sup>1</sup> H NMR (250 MHz, CDCl <sub>3</sub> ) of <b>10</b>                         | S4          |
| <sup>1</sup> H NMR (250 MHz, CDCl <sub>3</sub> ) of <b>11</b>                         | S4          |
| <sup>1</sup> H NMR (250 MHz, CDCl <sub>3</sub> ) of <b>12</b>                         | S5          |
| <sup>1</sup> H NMR (250 MHz, CDCl <sub>3</sub> ) of <b>13</b>                         | S5          |
| <sup>1</sup> H NMR (400 MHz, CDCl <sub>3</sub> ) of <b>14</b>                         | S6          |
| <sup>1</sup> H NMR (250 MHz, CDCl <sub>3</sub> ) of <b>16</b>                         | S6          |
| <sup>1</sup> H NMR (250 MHz, CDCl <sub>3</sub> ) of <b>18</b>                         | S7          |

| Acquisition Time (sec) | 1.9923               | Comment           | Carla pMeOIC - CDCI3 - Av 400MHz - out31ccpH1                        | Date                   | 31 Oct 2012 14:46:56 |
|------------------------|----------------------|-------------------|----------------------------------------------------------------------|------------------------|----------------------|
| Date Stamp             | 31 Oct 2012 14:46:56 | File Name         | C:\Users\carla\Documents\laboratório\pos doc\rmn2012\out31ccpH1\1fid |                        |                      |
| Frequency (MHz)        | 400.18               | Nucleus           | 1H                                                                   | Number of Transients   | 16                   |
| Original Points Count  | 16384                | Owner             | avance                                                               | Points Count           | 16384                |
| Receiver Gain          | 144.00               | SW(cyclical) (Hz) | 8223.68                                                              | Solvent                | CHLOROFORM-d         |
| Spectrum Offset (Hz)   | 2455.7114            | Spectrum Type     | STANDARD                                                             | Sweep Width (Hz)       | 8223.18              |
|                        |                      |                   |                                                                      | Temperature (degree C) | 22.860               |

out31ccpH1.001.esp

VerticalScaleFactor = 1

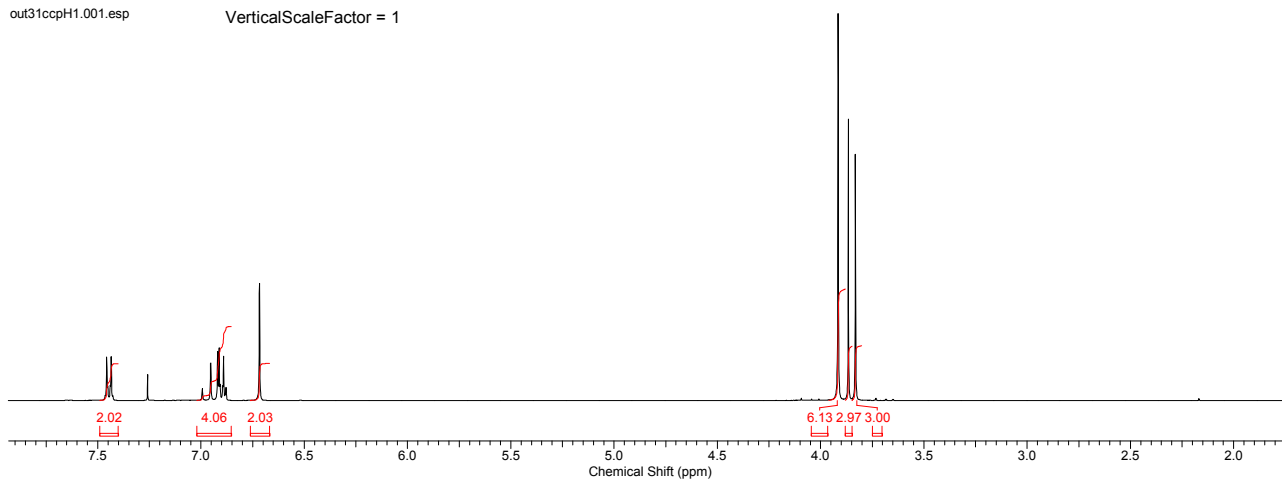Figure S9:  $^1\text{H}$  NMR (400 MHz,  $\text{CDCl}_3$ ) of **3**.

| Acquisition Time (sec) | 3.1654               | Comment           | Carla CDCI3 CCP03PUR jul24ccpH                                       | Date                   | 24 Jul 2012 17:58:40 |
|------------------------|----------------------|-------------------|----------------------------------------------------------------------|------------------------|----------------------|
| Date Stamp             | 24 Jul 2012 17:58:40 | File Name         | C:\Users\carla\Documents\laboratório\pos doc\rmn2012\jul24ccpH1\1fid |                        |                      |
| Frequency (MHz)        | 250.13               | Nucleus           | 1H                                                                   | Number of Transients   | 16                   |
| Original Points Count  | 16384                | Owner             | root                                                                 | Points Count           | 16384                |
| Receiver Gain          | 287.40               | SW(cyclical) (Hz) | 5175.98                                                              | Solvent                | CHLOROFORM-d         |
| Spectrum Offset (Hz)   | 1749.7061            | Spectrum Type     | STANDARD                                                             | Sweep Width (Hz)       | 5175.67              |
|                        |                      |                   |                                                                      | Temperature (degree C) | 25.160               |

jul24ccpH.001.esp

VerticalScaleFactor = 1

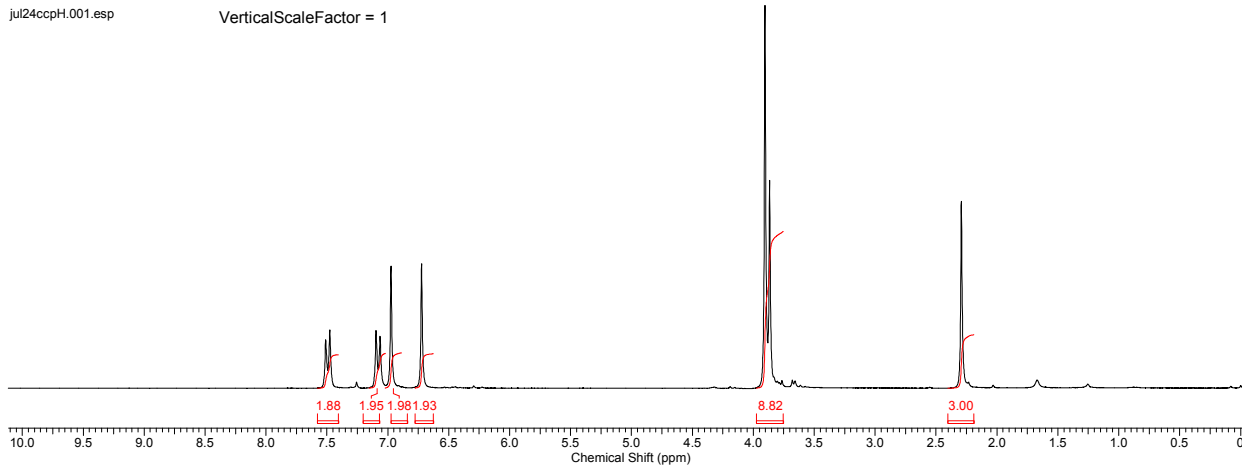Figure S1:  $^1\text{H}$  NMR (250 MHz,  $\text{CDCl}_3$ ) of **5**.

|                               |                      |                          |                                                                       |                               |                      |
|-------------------------------|----------------------|--------------------------|-----------------------------------------------------------------------|-------------------------------|----------------------|
| <b>Acquisition Time (sec)</b> | 0.5439               | <b>Comment</b>           | ac05 Carla 250 MHz oct01ccpC                                          | <b>Date</b>                   | 01 Oct 2012 16:09:52 |
| <b>Date Stamp</b>             | 01 Oct 2012 16:09:52 | <b>File Name</b>         | C:\Users\carla\Documents\laboratório\pos doc\vmn\2012\oct01ccpC\1.fid | <b>Origin</b>                 | spect                |
| <b>Frequency (MHz)</b>        | 62.90                | <b>Nucleus</b>           | <sup>13</sup> C                                                       | <b>Number of Transients</b>   | 1024                 |
| <b>Original Points Count</b>  | 8192                 | <b>Owner</b>             | root                                                                  | <b>Points Count</b>           | 8192                 |
| <b>Receiver Gain</b>          | 322.50               | <b>SW(cyclical) (Hz)</b> | 15060.24                                                              | <b>Solvent</b>                | CHLOROFORM-d         |
| <b>Spectrum Offset (Hz)</b>   | 6287.0034            | <b>Spectrum Type</b>     | STANDARD                                                              | <b>Sweep Width (Hz)</b>       | 15058.40             |
|                               |                      |                          |                                                                       | <b>Temperature (degree C)</b> | 25.160               |

oct01ccpC.001.esp

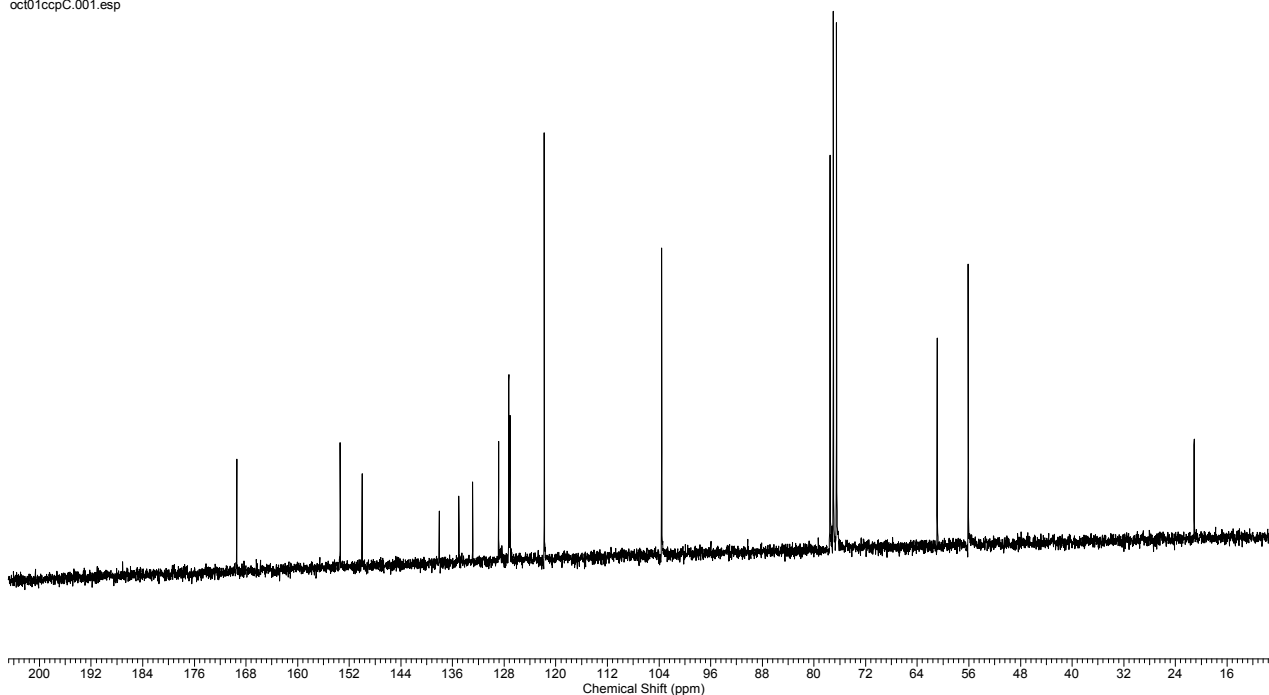Figure S2: <sup>13</sup>C NMR (62.5 MHz, CDCl<sub>3</sub>) of **5**

|                               |                      |                             |                                |                               |                      |
|-------------------------------|----------------------|-----------------------------|--------------------------------|-------------------------------|----------------------|
| <b>Acquisition Time (sec)</b> | 3.1654               | <b>Comment</b>              | Carla "pme" 250 MHz nov08ccpH3 | <b>Date</b>                   | 08 Nov 2012 13:51:28 |
| <b>Date Stamp</b>             | 08 Nov 2012 13:51:28 | <b>File Name</b>            | F:\nov08ccpH3\1.fid            | <b>Frequency (MHz)</b>        | 250.13               |
| <b>Nucleus</b>                | <sup>1</sup> H       | <b>Number of Transients</b> | 16                             | <b>Origin</b>                 | spect                |
| <b>Points Count</b>           | 16384                | <b>Pulse Sequence</b>       | zg30                           | <b>Original Points Count</b>  | 16384                |
| <b>Spectrum Offset (Hz)</b>   | 1752.8923            | <b>Spectrum Type</b>        | STANDARD                       | <b>Receiver Gain</b>          | 2580.30              |
|                               |                      |                             |                                | <b>SW(cyclical) (Hz)</b>      | 5175.98              |
|                               |                      |                             |                                | <b>Solvent</b>                | CHLOROFORM-d         |
|                               |                      |                             |                                | <b>Sweep Width (Hz)</b>       | 5175.67              |
|                               |                      |                             |                                | <b>Temperature (degree C)</b> | 25.160               |

nov08ccpH3.001.esp

VerticalScaleFactor = 1

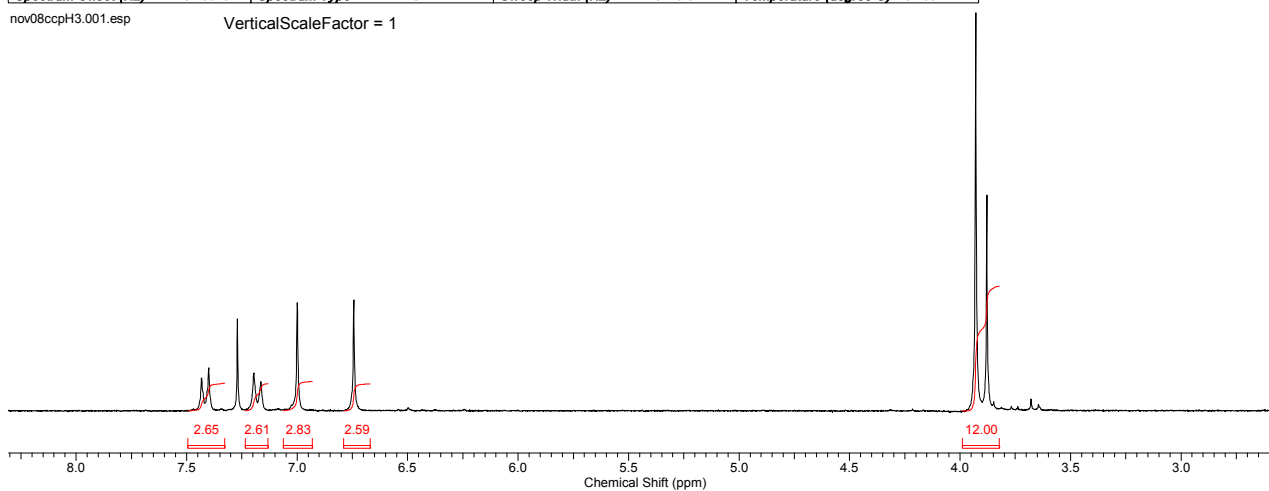Figure S3: <sup>1</sup>H NMR (250 MHz, CDCl<sub>3</sub>) of **9**.

|                               |                      |                          |                                                                        |                             |              |                               |        |
|-------------------------------|----------------------|--------------------------|------------------------------------------------------------------------|-----------------------------|--------------|-------------------------------|--------|
| <b>Acquisition Time (sec)</b> | 3.1654               | <b>Comment</b>           | carla pClIV 250 MHz out24ccpH2                                         |                             | <b>Date</b>  | 24 Oct 2012 14:25:36          |        |
| <b>Date Stamp</b>             | 24 Oct 2012 14:25:36 | <b>File Name</b>         | C:\Users\carla\Documents\laboratório\pos doc\rmn\2012\out24ccpH2\1.fid |                             |              |                               |        |
| <b>Frequency (MHz)</b>        | 250.13               | <b>Nucleus</b>           | 1H                                                                     | <b>Number of Transients</b> | 16           | <b>Origin</b>                 | spect  |
| <b>Original Points Count</b>  | 16384                | <b>Owner</b>             | root                                                                   | <b>Points Count</b>         | 16384        | <b>Pulse Sequence</b>         | zg30   |
| <b>Receiver Gain</b>          | 574.70               | <b>SW(cyclical) (Hz)</b> | 5175.98                                                                | <b>Solvent</b>              | CHLOROFORM-d |                               |        |
| <b>Spectrum Offset (Hz)</b>   | 1749.3901            | <b>Spectrum Type</b>     | STANDARD                                                               | <b>Sweep Width (Hz)</b>     | 5175.67      | <b>Temperature (degree C)</b> | 25.160 |

out24ccpH2.001.esp

VerticalScaleFactor = 1

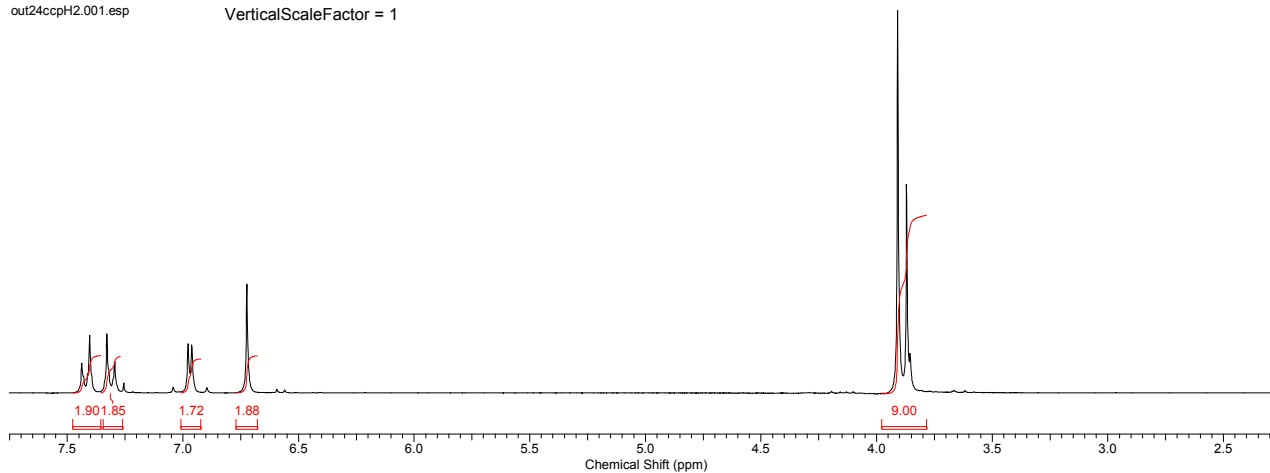Figure S4:  $^1\text{H}$  NMR (250 MHz,  $\text{CDCl}_3$ ) of **10**.

|                               |                      |                          |                              |                             |              |                               |        |
|-------------------------------|----------------------|--------------------------|------------------------------|-----------------------------|--------------|-------------------------------|--------|
| <b>Acquisition Time (sec)</b> | 3.1654               | <b>Comment</b>           | Carla pNO2 250 MHz jul25ccpH |                             | <b>Date</b>  | 25 Jul 2013 13:14:56          |        |
| <b>Date Stamp</b>             | 25 Jul 2013 13:14:56 | <b>File Name</b>         | F:\jul25ccpH\1.fid           |                             |              |                               |        |
| <b>Frequency (MHz)</b>        | 250.13               | <b>Nucleus</b>           | 1H                           | <b>Number of Transients</b> | 16           | <b>Origin</b>                 | spect  |
| <b>Original Points Count</b>  | 16384                | <b>Owner</b>             | root                         | <b>Points Count</b>         | 16384        | <b>Pulse Sequence</b>         | zg30   |
| <b>Receiver Gain</b>          | 4096.00              | <b>SW(cyclical) (Hz)</b> | 5175.98                      | <b>Solvent</b>              | CHLOROFORM-d |                               |        |
| <b>Spectrum Offset (Hz)</b>   | 1750.9110            | <b>Spectrum Type</b>     | STANDARD                     | <b>Sweep Width (Hz)</b>     | 5175.67      | <b>Temperature (degree C)</b> | 25.160 |

jul25ccpH.001.esp

VerticalScaleFactor = 1

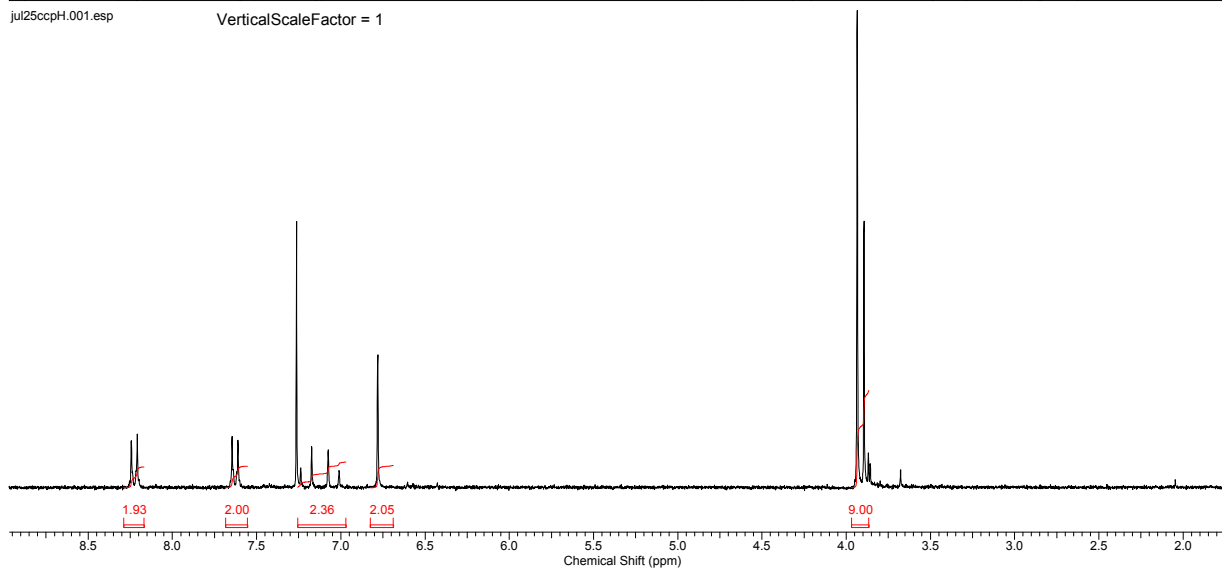Figure S5:  $^1\text{H}$  NMR (250 MHz,  $\text{CDCl}_3$ ) of **11**.

|                               |                      |                          |                                                                      |                               |                      |
|-------------------------------|----------------------|--------------------------|----------------------------------------------------------------------|-------------------------------|----------------------|
| <b>Acquisition Time (sec)</b> | 3.1654               | <b>Comment</b>           | Carla "dimeocr" 250 MHz nov08ccpH                                    | <b>Date</b>                   | 08 Nov 2012 13:40:48 |
| <b>Date Stamp</b>             | 08 Nov 2012 13:40:48 | <b>File Name</b>         | C:\Users\carla\Documents\laboratório\pos doc\rmn\2012\nov08ccpH\1fid |                               |                      |
| <b>Frequency (MHz)</b>        | 250.13               | <b>Nucleus</b>           | <sup>1</sup> H                                                       | <b>Number of Transients</b>   | 16                   |
| <b>Original Points Count</b>  | 16384                | <b>Owner</b>             | root                                                                 | <b>Points Count</b>           | 16384                |
| <b>Receiver Gain</b>          | 2298.80              | <b>SW(cyclical) (Hz)</b> | 5175.98                                                              | <b>Solvent</b>                | CHLOROFORM-d         |
| <b>Spectrum Offset (Hz)</b>   | 1750.3379            | <b>Spectrum Type</b>     | STANDARD                                                             | <b>Sweep Width (Hz)</b>       | 5175.67              |
|                               |                      |                          |                                                                      | <b>Temperature (degree C)</b> | 25.160               |

nov08ccpH.001.esp

VerticalScaleFactor = 1

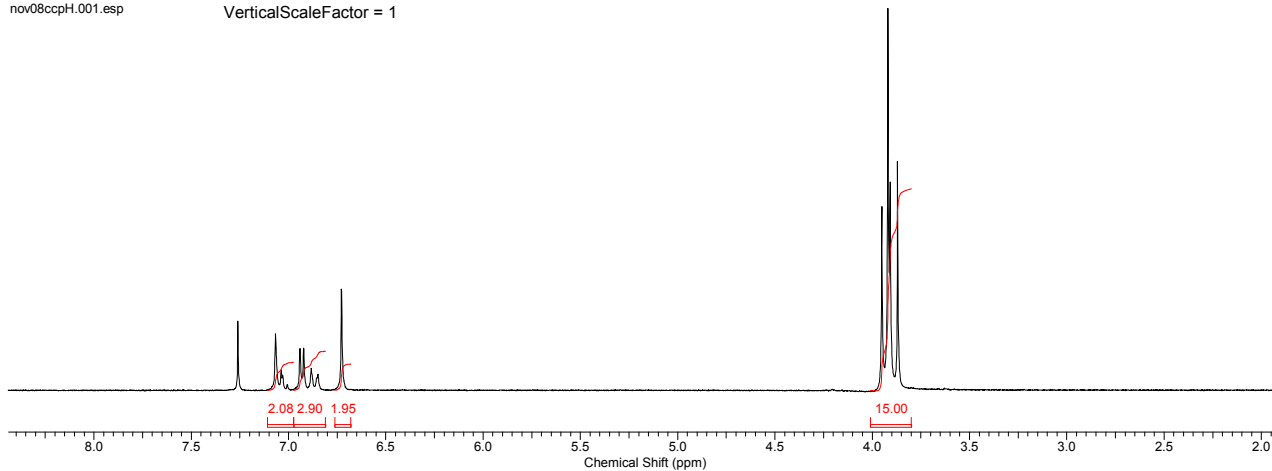Figure S6: <sup>1</sup>H NMR (250 MHz, CDCl<sub>3</sub>) of **12**.

|                               |           |                          |                                                        |                               |              |
|-------------------------------|-----------|--------------------------|--------------------------------------------------------|-------------------------------|--------------|
| <b>Acquisition Time (sec)</b> | 3.1654    | <b>Comment</b>           |                                                        | <b>Date</b>                   | Dec 2012     |
| <b>Date Stamp</b>             | Dec 2012  | <b>File Name</b>         | C:\Users\carla\Documents\laboratório\pos doc\rmn\2012\ |                               |              |
| <b>Frequency (MHz)</b>        | 250.13    | <b>Nucleus</b>           | <sup>1</sup> H                                         | <b>Number of Transients</b>   | 11           |
| <b>Original Points Count</b>  | 16384     | <b>Owner</b>             | root                                                   | <b>Points Count</b>           | 16384        |
| <b>Receiver Gain</b>          | 574.70    | <b>SW(cyclical) (Hz)</b> | 5175.98                                                | <b>Solvent</b>                | CHLOROFORM-d |
| <b>Spectrum Offset (Hz)</b>   | 1747.8105 | <b>Spectrum Type</b>     | STANDARD                                               | <b>Sweep Width (Hz)</b>       | 5175.67      |
|                               |           |                          |                                                        | <b>Temperature (degree C)</b> | 25.160       |

dez13ccpH3.001.esp

VerticalScaleFactor = 1

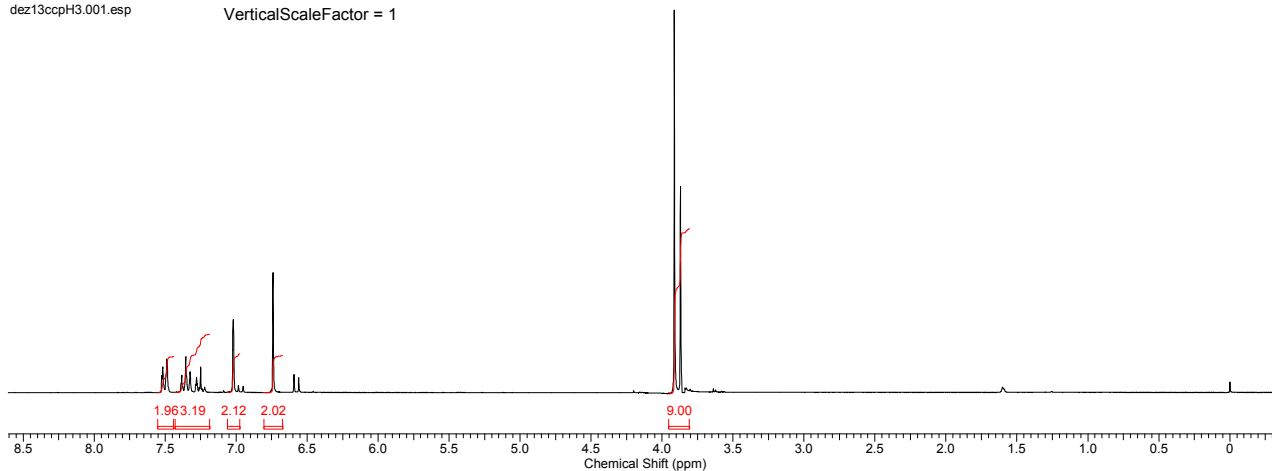Figure S7: <sup>1</sup>H NMR (250 MHz, CDCl<sub>3</sub>) of **13**.

|                               |                      |                          |                                                                       |                               |                      |
|-------------------------------|----------------------|--------------------------|-----------------------------------------------------------------------|-------------------------------|----------------------|
| <b>Acquisition Time (sec)</b> | 3.1654               | <b>Comment</b>           | olcf3 250 MHz dez13ccpH2                                              | <b>Date</b>                   | 13 Dec 2012 13:08:48 |
| <b>Date Stamp</b>             | 13 Dec 2012 13:08:48 | <b>File Name</b>         | C:\Users\carla\Documents\laboratório\pos doc\vrml2012\dez13ccpH2\1fid |                               |                      |
| <b>Frequency (MHz)</b>        | 250.13               | <b>Nucleus</b>           | 1H                                                                    | <b>Number of Transients</b>   | 16                   |
| <b>Original Points Count</b>  | 16384                | <b>Owner</b>             | root                                                                  | <b>Points Count</b>           | 16384                |
| <b>Receiver Gain</b>          | 2298.80              | <b>SW(cyclical) (Hz)</b> | 5175.98                                                               | <b>Solvent</b>                | CHLOROFORM-d         |
| <b>Spectrum Offset (Hz)</b>   | 1749.7061            | <b>Spectrum Type</b>     | STANDARD                                                              | <b>Sweep Width (Hz)</b>       | 5175.67              |
|                               |                      |                          |                                                                       | <b>Temperature (degree C)</b> | 25.160               |

dez13ccpH2.001.esp

VerticalScaleFactor = 1

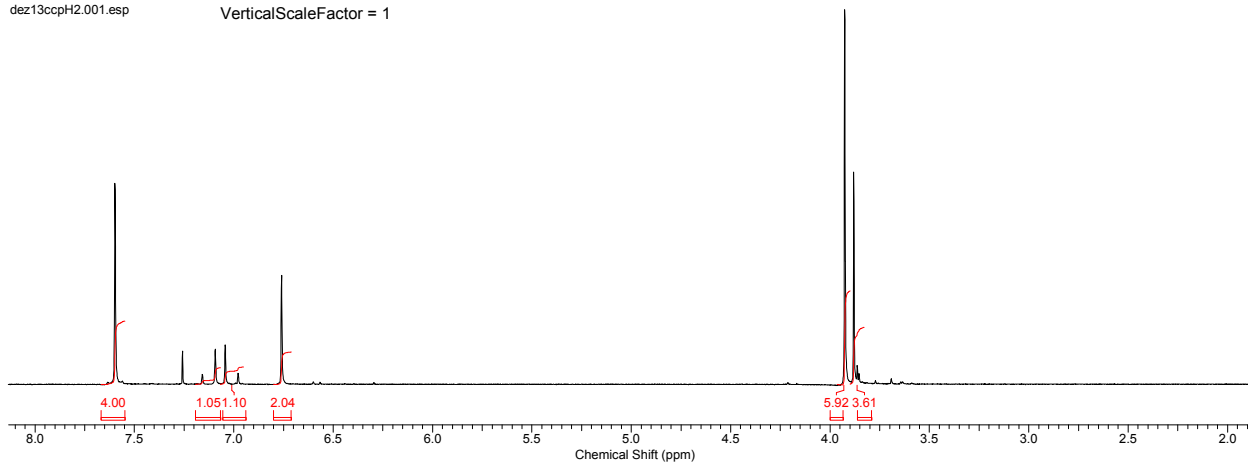Figure S8:  $^1\text{H}$  NMR (250 MHz,  $\text{CDCl}_3$ ) of **14**.

|                               |                      |                             |                    |                           |             |                               |          |
|-------------------------------|----------------------|-----------------------------|--------------------|---------------------------|-------------|-------------------------------|----------|
| <b>Acquisition Time (sec)</b> | 1.6384               | <b>Comment</b>              | Carla "ccp 42"     | cdcl3/Av500MHz_mai22ccpH1 | <b>Date</b> | 23 May 2013 05:17:04          |          |
| <b>Date Stamp</b>             | 23 May 2013 05:17:04 | <b>File Name</b>            | F:\mai22ccpH1\1fid |                           |             | <b>Frequency (MHz)</b>        | 499.87   |
| <b>Nucleus</b>                | 1H                   | <b>Number of Transients</b> | 32                 | <b>Origin</b>             | spect       | <b>Original Points Count</b>  | 16384    |
| <b>Points Count</b>           | 16384                | <b>Pulse Sequence</b>       | zg30               | <b>Receiver Gain</b>      | 181.00      | <b>SW(cyclical) (Hz)</b>      | 10000.00 |
| <b>Spectrum Offset (Hz)</b>   | 3069.1528            | <b>Spectrum Type</b>        | STANDARD           | <b>Sweep Width (Hz)</b>   | 9999.39     | <b>Temperature (degree C)</b> | 25.156   |

mai22ccpH1.001.esp

VerticalScaleFactor = 1

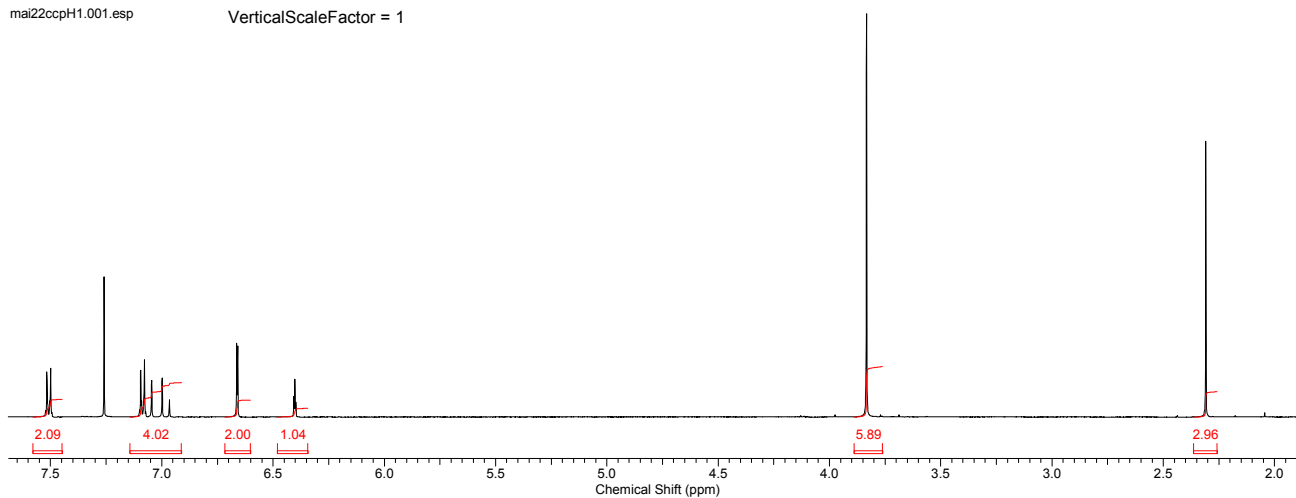Figure S10:  $^1\text{H}$  NMR (500 MHz,  $\text{CDCl}_3$ ) of **16**.

|                               |                      |                             |                                          |                               |                      |
|-------------------------------|----------------------|-----------------------------|------------------------------------------|-------------------------------|----------------------|
| <b>Acquisition Time (sec)</b> | 3.1654               | <b>Comment</b>              | ccp41 - Carla - CDCl3 - 2013 - mai02ccpH | <b>Date</b>                   | 02 May 2013 13:49:04 |
| <b>Date Stamp</b>             | 02 May 2013 13:49:04 | <b>File Name</b>            | F:\mai02ccpH\1fid                        | <b>Frequency (MHz)</b>        | 250.13               |
| <b>Nucleus</b>                | <sup>1</sup> H       | <b>Number of Transients</b> | 16                                       | <b>Origin</b>                 | spect                |
| <b>Points Count</b>           | 16384                | <b>Pulse Sequence</b>       | zg30                                     | <b>Original Points Count</b>  | 16384                |
| <b>Spectrum Offset (Hz)</b>   | 1749.7061            | <b>Spectrum Type</b>        | STANDARD                                 | <b>Receiver Gain</b>          | 2298.80              |
|                               |                      |                             |                                          | <b>SW(cyclical) (Hz)</b>      | 5175.98              |
|                               |                      |                             |                                          | <b>Sweep Width (Hz)</b>       | 5175.67              |
|                               |                      |                             |                                          | <b>Temperature (degree C)</b> | 25.160               |
|                               |                      |                             |                                          | <b>Owner</b>                  | root                 |
|                               |                      |                             |                                          | <b>Solvent</b>                | CHLOROFORM-d         |

mai02ccpH.001.esp

VerticalScaleFactor = 1

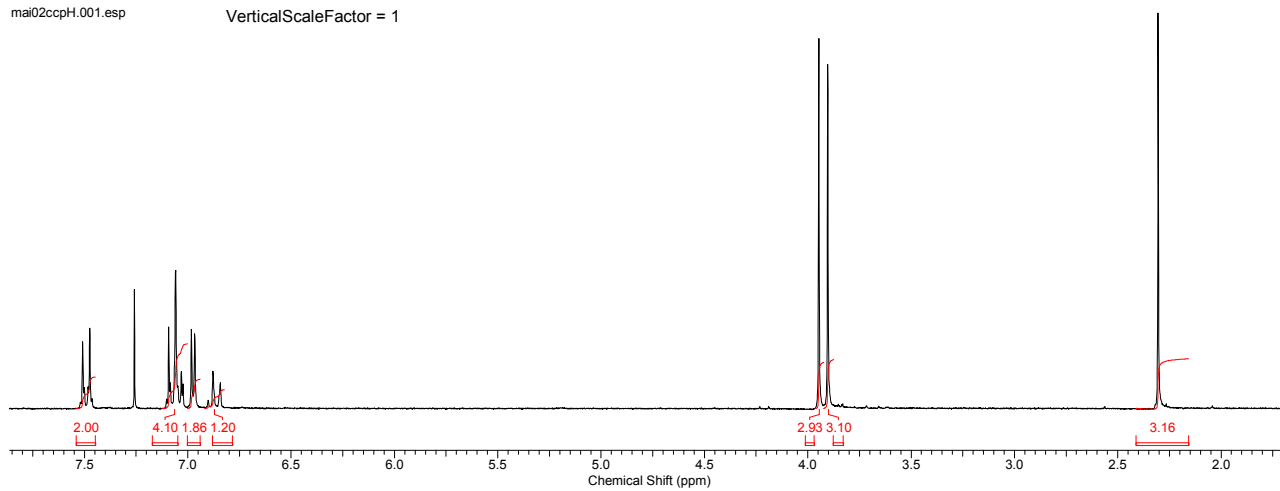Figure S11: <sup>1</sup>H NMR (250 MHz, CDCl<sub>3</sub>) of **18**.
